1 **Genes and pathways implicated in tetralogy of Fallot revealed by ultra-rare**  
2 **variant burden analysis in 231 genome sequences**

3  
4 Roozbeh Manshaei PhD<sup>1,§</sup>, Daniele Merico PhD<sup>2,3,§</sup>, Miriam S. Reuter MD<sup>1,3</sup>, Worrawat  
5 Engchuan PhD<sup>3</sup>, Bahareh A. Mojarad PhD<sup>4</sup>, Rajiv Chaturvedi MD, PhD<sup>1,5</sup>, Tracy Heung BSc<sup>7</sup>,  
6 Giovanna Pellicchia PhD<sup>3</sup>, Mehdi Zarrei PhD<sup>3,4</sup>, Thomas Nalpathamkalam BSc<sup>3</sup>, Reem Khan  
7 MA<sup>1</sup>, John B. A. Okello PhD<sup>1</sup>, Eriskay Liston MSc<sup>1</sup>, Meredith Curtis BSc<sup>1</sup>, Ryan K.C. Yuen  
8 PhD<sup>3,4</sup>, Christian R. Marshall PhD<sup>3,6,7,8</sup>, Rebekah K. Jobling MD<sup>1,7</sup>, Stephen W. Scherer  
9 PhD<sup>3,4,6,9</sup>, Raymond H. Kim MD, PhD<sup>1,10,11,φ</sup>, Anne S. Bassett MD<sup>12,13,14,15,φ,\*</sup>

10  
11 <sup>1</sup> Ted Rogers Centre for Heart Research, Cardiac Genome Clinic, The Hospital for Sick Children,  
12 Toronto, Ontario, Canada

13 <sup>2</sup> Deep Genomics Inc., Toronto ON Canada

14 <sup>3</sup> The Centre for Applied Genomics, The Hospital for Sick Children, Toronto, Ontario, Canada

15 <sup>4</sup> Program in Genetics and Genome Biology, The Hospital for Sick Children, Toronto, Ontario,  
16 Canada

17 <sup>5</sup> Labatt Heart Centre, Division of Cardiology, The Hospital for Sick Children, Toronto, Ontario,  
18 Canada

19 <sup>6</sup> Centre for Genetic Medicine, The Hospital for Sick Children, Toronto, Ontario, Canada

20 <sup>7</sup> Genome Diagnostics, Department of Paediatric Laboratory Medicine, The Hospital for Sick  
21 Children, Toronto, Ontario, Canada

22 <sup>8</sup> Laboratory Medicine and Pathobiology, University of Toronto, Toronto, Ontario, Canada

23 <sup>9</sup> Department of Molecular Genetics, University of Toronto, Toronto, Ontario, Canada

24 <sup>10</sup> Division of Clinical and Metabolic Genetics, The Hospital for Sick Children, Toronto, Ontario,  
25 Canada

26 <sup>11</sup> Fred A. Litwin Family Centre in Genetic Medicine, University Health Network, Department of  
27 Medicine, University of Toronto, Toronto, Ontario, Canada

28 <sup>12</sup> Clinical Genetics Research Program, Centre for Addiction and Mental Health, Toronto, Ontario,  
29 Canada

30 <sup>13</sup> Division of Cardiology, Toronto Congenital Cardiac Centre for Adults at the Peter Munk Cardiac  
31 Centre, Department of Medicine, University Health Network, Toronto, Ontario, Canada

32 <sup>14</sup> The Dalglish Family 22q Clinic for Adults with 22q11.2 Deletion Syndrome, Department of  
33 Psychiatry, and Toronto General Research Institute, University Health Network, Toronto, Ontario,  
34 Canada

35 <sup>15</sup> Department of Psychiatry, University of Toronto, Toronto, Ontario, Canada

36  
37 § These authors contributed equally to the work.

38 φ These authors shared the senior authorship.

39 \* Correspondence: [anne.bassett@utoronto.ca](mailto:anne.bassett@utoronto.ca)

40  
41 Word count: Abstract = 279 words; Text = 7870 words

42 3 Tables; 3 Figures; 14 Supplemental tables; 5 Supplemental figures

43  
44

45 **Abstract**

46 Recent genome-wide studies of rare genetic variants have begun to implicate novel mechanisms  
47 for tetralogy of Fallot (TOF), a severe congenital heart defect (CHD).

48 To provide statistical support for case-only data without parental genomes, we re-analyzed genome  
49 sequences of 231 individuals with TOF or related CHD. We adapted a burden test originally  
50 developed for *de novo* variants to assess singleton variant burden in individual genes, and in gene-  
51 sets corresponding to functional pathways and mouse phenotypes, accounting for highly correlated  
52 gene-sets, and for multiple testing.

53 The gene burden test identified a significant burden of deleterious missense variants in *NOTCH1*  
54 (Bonferroni-corrected p-value <0.01). These *NOTCH1* variants showed significant enrichment for  
55 those affecting the extracellular domain, and especially for disruption of cysteine residues forming  
56 disulfide bonds (OR 39.8 vs gnomAD). Individuals with *NOTCH1* variants, all with TOF, were  
57 enriched for positive family history of CHD. Other genes not previously implicated in TOF had  
58 more modest statistical support and singleton missense variant results were non-significant for  
59 gene-set burden. For singleton truncating variants, the gene burden test confirmed significant  
60 burden in *FLT4*. Gene-set burden tests identified a cluster of pathways corresponding to VEGF  
61 signaling (*FDR*=0%), and of mouse phenotypes corresponding to abnormal vasculature  
62 (*FDR*=0.8%), that suggested additional candidate genes not previously identified (e.g., *WNT5A* and  
63 *ZFAND5*). Analyses using unrelated sequencing datasets supported specificity of the findings for  
64 CHD.

65 The findings support the importance of ultra-rare variants disrupting genes involved in VEGF and  
66 NOTCH signaling in the genetic architecture of TOF. These proof-of-principle data indicate that  
67 this statistical methodology could assist in analyzing case-only sequencing data in which ultra-rare

68 variants, whether *de novo* or inherited, contribute to the genetic etiopathogenesis of a complex  
69 disorder.

## 70 **Author summary**

71 We analyzed the ultra-rare nonsynonymous variant burden for genome sequencing data from 231  
72 individuals with congenital heart defects, most with tetralogy of Fallot. We adapted a burden test  
73 originally developed for *de novo* variants. In line with other studies, we identified a significant  
74 truncating variant burden for *FLT4* and deleterious missense burden for *NOTCH1*, both passing a  
75 stringent Bonferroni multiple-test correction. For *NOTCH1*, we observed frequent disruption of  
76 cysteine residues establishing disulfide bonds in the extracellular domain. We also identified genes  
77 with BH-FDR <10% that were not previously implicated. To overcome limited power for  
78 individual genes, we tested gene-sets corresponding to functional pathways and mouse phenotypes.  
79 Gene-set burden of truncating variants was significant for vascular endothelial growth factor  
80 signaling and abnormal vasculature phenotypes. These results confirmed previous findings and  
81 suggested additional candidate genes for experimental validation in future studies. This  
82 methodology can be extended to other case-only sequencing data in which ultra-rare variants make  
83 a substantial contribution to genetic etiology.

## 84 **Introduction**

85 Congenital heart defects (CHD) occur in 8/1000 live births and are a leading cause of mortality  
86 from birth defects (1), with a wide spectrum of severity (2). Among CHD, tetralogy of Fallot (TOF)  
87 is the most common of the more severe (cyanotic) conditions. Individuals with TOF present with  
88 a combination of abnormalities (pulmonary valve stenosis, right ventricular hypertrophy,  
89 ventricular septal defect and overriding aorta) that together lead to insufficient tissue oxygenation.

90 Genetic factors are major contributors to the etiology of TOF. These include 20% of patients with  
91 pathogenic copy number variants (CNV) or larger chromosomal anomalies (3,4). Recent studies  
92 have also begun to elucidate the genome-wide role of rare variants at the sequence level, including  
93 substitutions and small insertions/deletions.

94 In a multi-centre exome sequencing study of various CHD that focused on loss-of-function variants  
95 and included parental sequencing data enabling *de novo* variant identification, the TOF sub-group  
96 drove a significant genome-wide burden finding ( $p\text{-value} \leq 1.3 \times 10^{-6}$ ) of *de novo* and rare inherited  
97 heterozygous truncating variants for a novel gene, *FLT4* (5). Of 9 probands with *FLT4* truncating  
98 variants, corresponding to 2.3% of the TOF group, 7 were inherited with evidence of incomplete  
99 penetrance (5).

100 In an independent case-only study using whole genome sequencing (WGS), we investigated 175  
101 adults with TOF for rare loss-of-function variants (including structural variants) disrupting *FLT4*  
102 and other vascular endothelial growth factor (VEGF) pathway genes predicted to be  
103 haploinsufficient based on the ExAC pLI index (6,7). We identified seven truncating variants in  
104 *FLT4*, two in *KDR*, and one each in *BCAR1*, *FGD5*, *FOXO1*, *IQGAPI* and *PRDMI*, corresponding  
105 in aggregate to 8% of participants; all variants were absent from public databases<sup>6</sup>. The results  
106 suggested the importance of VEGF signaling; however, the statistical burden was not  
107 systematically investigated. Another recent multi-centre exome sequencing study of 829 patients  
108 with TOF reported genome-wide significant ( $p\text{-value} \leq 5 \times 10^{-8}$ ) excess of ultra-rare (absent from a  
109 public exome database and other reference data) deleterious variants for *FLT4* and *NOTCH1* (8).  
110 Loss-of-function variants predominated for *FLT4*, and missense variants for *NOTCH1* (8).

111 In this study, we undertook a comprehensive statistical re-analysis of the cohort with WGS data  
112 previously investigated for ultra-rare variants in the VEGF pathway (6). In an attempt to boost

113 power, we included the sequencing data available for 56 CHD cases as well as for the original 175  
114 TOF cases (n=231 total). We focused on ultra-rare truncating (stop-gain, frameshift and splice site  
115 altering) and missense variants that were not reported in the gnomAD database and were identified  
116 in only one proband, i.e., that were singletons. We tested burden by adapting a test originally  
117 developed for *de novo* variants by rescaling the mutation probability for singletons. Since  
118 singletons are enriched in *de novo* variants and are likely to have arisen recently, this is an  
119 appropriate extension of the test. To boost power, we additionally tested gene-sets corresponding  
120 to (a) functional pathways, derived from Gene Ontology (GO) (9), BioCarta ([http://cgap.nci.nih-](http://cgap.nci.nih.gov/Pathways/BioCarta_Pathways/)  
121 [.gov/Pathways/BioCarta\\_Pathways/](http://cgap.nci.nih.gov/Pathways/BioCarta_Pathways/)), Kyoto Encyclopedia of Genes and Genomes (KEGG) (10)  
122 (<http://www.genome.jp/kegg/>), REACTOME (11), NCI-Nature Pathway Interaction Database  
123 (PID) (<http://pid.nci.nih.gov>); and (b) phenotypes in mouse orthologues, derived from Mouse  
124 Genome Informatics (MGI) and based on the Mouse Phenotype Ontology (MPO) classification  
125 (12). To control for correlations between highly overlapping gene-sets that could lead to incorrect  
126 multiple p-value corrections, we adopted a greedy step-down approach to cluster gene-sets with  
127 highly overlapping genes. A sampling-based false discovery rate (FDR) was then estimated. We  
128 did not analyze structural variants because no broadly-accepted probabilistic framework has yet  
129 been developed to determine the statistical significance of their burden.

## 130 **Results**

### 131 **Identification of singleton variants**

132 Variant calls from the CHD WGS data-set were filtered to retain only high-quality singletons, that  
133 were then categorized as truncating or missense based on their effect on the principal transcript  
134 (see Materials and Methods for details). With respect to the 2,003 truncating singleton variants

135 initially identified, 868 variants remained after applying the low quality and frameshift indel filter,  
136 764 after applying the principal transcript effect filter, 752 after applying the splice site alteration  
137 filter, and finally 642 after considering a maximum of one singleton variant per gene per subject.  
138 For the 4,324 missense variants initially identified, 3,521 remained after applying the low-quality  
139 filter, 3,359 after applying the principal transcript filter, and finally, 3,293 singleton missense  
140 variants after considering a maximum of one singleton variant per gene per subject. We then tested  
141 these ultra-rare truncating and missense singleton variants for gene and gene-set burden (see [Figure](#)  
142 [1](#) for an overview of the analysis workflow; all ultra-rare singleton variants identified are listed in  
143 [Supplementary Table S1](#)). For all analyses we tested truncating and missense variants separately  
144 because of the likely differences in the genetic architecture of these variant types.

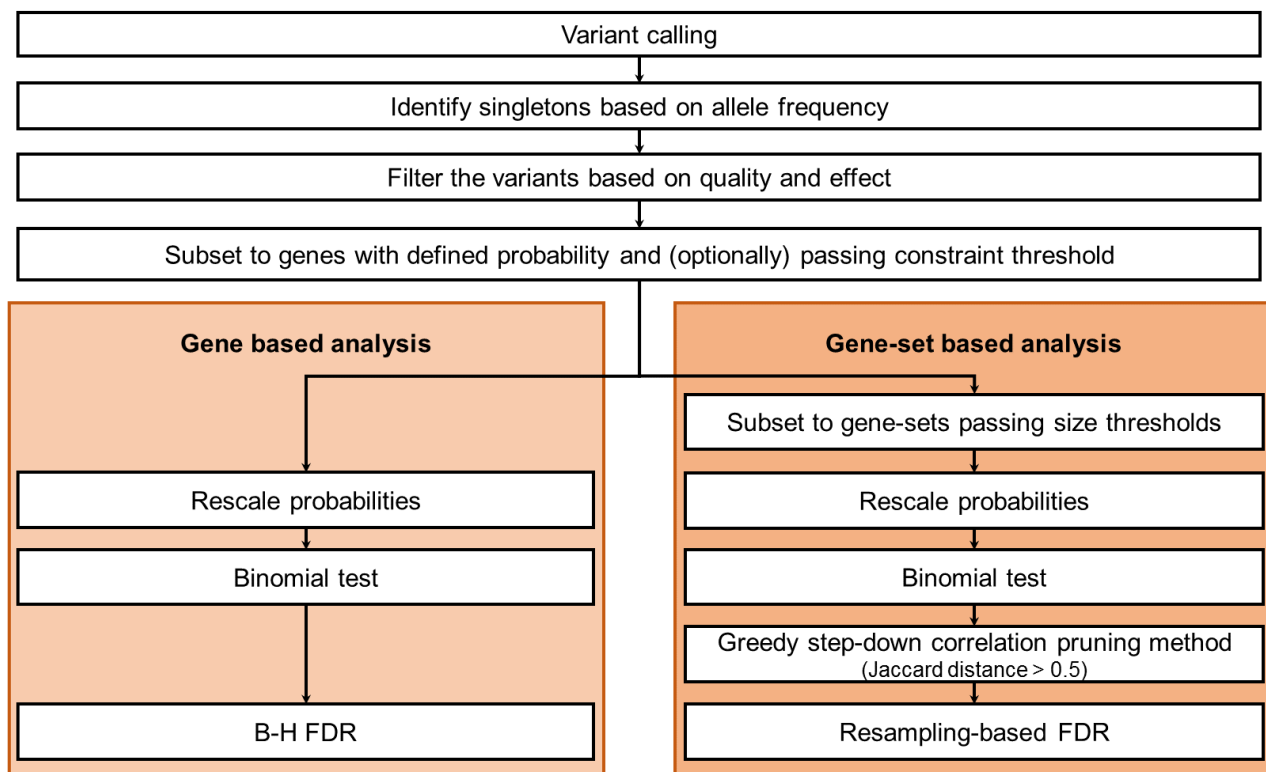

145

146 **Figure 1) General gene and gene-set burden analyses overview.**

147 **Gene burden results**

148 Genes were tested separately for the burden of singleton truncating and missense variants, using a  
149 binomial test based on rescaled *de novo* mutation probabilities (as described in the Materials and  
150 Methods). We performed multiple test correction on all genes with a defined probability, and also  
151 on a more constrained subset: for truncating variants, gnomAD LOF *o/e* < 0.35; for missense  
152 variants, gnomAD missense *o/e* < 0.75 (where *o/e* indicates observed/expected; see [Supplementary](#)  
153 [Figure S1](#) for the relation to the *pLI* and missense *z-score* constraint indexes). Constrained genes  
154 are presumed to be more likely to contribute to disease, since they are under negative selection;  
155 these thresholds were specifically set to include moderately constrained genes, considering the  
156 incomplete penetrance observed for TOF (5,6,8). There were 603 genes with at least one truncating  
157 singleton variant, of which 163 passed the constraint threshold; there were 2801 genes with at least  
158 one singleton missense variant, of which 739 passed the constraint threshold (see [Supplementary](#)  
159 [Table S2](#) and [Supplementary Table S3](#) for details). To assess the validity of the gene burden results,  
160 we performed several additional analyses: (a) we checked the distribution of observed p-values  
161 compared to expected p-values, to monitor for systematic p-value inflation; (b) we compared the  
162 p-values obtained for CHD to those obtained for WGS data available for 263 individuals with  
163 schizophrenia, processed in exactly the same way; (c) we reassessed the burden by comparing to  
164 gnomAD singletons.

165 For truncating variants, there was only one constrained gene (of the 163 with at least one singleton  
166 truncating variant) with significant burden: *FLT4* (uncorrected p-value =  $9.56 \times 10^{-12}$ , BH-FDR =  
167  $6.99 \times 10^{-8}$ , Bonferroni-corrected p-value =  $6.99 \times 10^{-8}$ ). When testing all genes (including 603 with  
168 at least one singleton truncating variant), in addition to *FLT4*, we identified *CLDN9* as significant  
169 at an FDR threshold of 10% (uncorrected p-value =  $7.80 \times 10^{-6}$ , BH-FDR = 0.073, Bonferroni-

170 corrected p-value = 0.145) (see [Table 1](#) and [Supplementary Table S2](#) for all details). There was no  
 171 evidence of genome-wide inflation in either analysis (see [Figure 2](#) and [Supplementary Figure S4](#)).  
 172 Considering the top-associated CHD genes without using a constraint threshold, none had a similar  
 173 p-value in the schizophrenia sequencing data. When applying the constraint threshold, a single top-  
 174 associated gene that failed the 10% BH-FDR threshold (*ATXN3*) appeared to have a somewhat  
 175 similar p-value for schizophrenia. However, visualization of the bam files for the schizophrenia  
 176 data re-classified those variants to be in-frame polymorphisms (see [Supplementary Table S4](#)). For  
 177 *FLT4* and *CLDN9*, where BH-FDR was under the 10% threshold, we evaluated the truncating

178 **Table 1) Top six nominally significant genes with ultra-rare (singleton) variants identified in 231**  
 179 **individuals with CHD, as inferred from gene-based burden analyses for truncating and missense**  
 180 **singletons, respectively, with and without using a gene constraint cut-off.**

| Gene Name                  | Number of observed variants <sup>1</sup> | All genes, no constraint |                       | Genes with constraint <sup>2</sup> |                       |
|----------------------------|------------------------------------------|--------------------------|-----------------------|------------------------------------|-----------------------|
|                            |                                          | p-value                  | BH-FDR <sup>3</sup>   | p-value                            | BH-FDR <sup>3</sup>   |
| <b>Truncating variants</b> |                                          |                          |                       |                                    |                       |
| <i>FLT4</i>                | 7                                        | $3.84 \times 10^{-10}$   | $7.15 \times 10^{-6}$ | $9.56 \times 10^{-12}$             | $6.99 \times 10^{-8}$ |
| <i>CLDN9</i>               | 2                                        | $7.80 \times 10^{-6}$    | 0.0726                | NA                                 | NA                    |
| <i>CCDC168</i>             | 2                                        | $2.20 \times 10^{-5}$    | 0.1365                | NA                                 | NA                    |
| <i>CSN2</i>                | 2                                        | 0.0001                   | 0.4823                | NA                                 | NA                    |
| <i>LITD1</i>               | 2                                        | 0.0001                   | 0.4823                | NA                                 | NA                    |
| <i>TACC3</i>               | 2                                        | 0.0002                   | 0.6402                | NA                                 | NA                    |
| <b>Missense variants</b>   |                                          |                          |                       |                                    |                       |
| <i>NOTCH1</i>              | 8                                        | $2.33 \times 10^{-6}$    | 0.0351                | $9.32 \times 10^{-7}$              | 0.0048                |
| <i>BCKDK</i>               | 4                                        | $3.70 \times 10^{-6}$    | 0.0351                | $2.26 \times 10^{-6}$              | 0.0058                |
| <i>KL</i>                  | 4                                        | $1.54 \times 10^{-5}$    | 0.0973                | NA                                 | NA                    |
| <i>DHH</i>                 | 3                                        | $3.01 \times 10^{-5}$    | 0.1369                | $2.08 \times 10^{-5}$              | 0.0361                |
| <i>PRRT4</i>               | 3                                        | $3.78 \times 10^{-5}$    | 0.1369                | NA                                 | NA                    |
| <i>VMAC</i>                | 2                                        | $4.33 \times 10^{-5}$    | 0.1369                | NA                                 | NA                    |

181 <sup>1</sup> All observed variants were in individuals with TOF, except 1 each in genes *CCDC36*, *CSN2*, *LITD1*, *TACC3*, *KL*,  
 182 *DHH*, and *PRRT4*.

183 <sup>2</sup> Only those variants in genes with o/e score in gnomAD <0.35 for truncating variants and <0.75 for missense variants  
 184 are considered.

185 <sup>3</sup> The *Benjamini Hochberg* False Discovery Rate.

186 NA = not available, indicating that the respective gene was not in the gene list, thus data were not available.



187 singleton burden in CHD compared to that in gnomAD: *FLT4* had an even more significant  
188 association (uncorrected p-value =  $2.43 \times 10^{-15}$ , BH-FDR =  $4.01 \times 10^{-11}$ ), whereas *CLDN9* was less  
189 significant (uncorrected p-value =  $7.8 \times 10^{-4}$ , BH-FDR = 1), leading us to question the validity of its  
190 association to CHD (see [Supplementary Table S5](#) and [Supplementary Figure S2](#)). Restricting to  
191 constrained genes may have some utility in prioritizing genes, but these results are too limited to  
192 draw robust general conclusions.

193 Of the 739 genes with singleton missense variants that passed the constraint threshold, there were  
194 three genes that passed the 10% FDR threshold: *NOTCH1* (uncorrected p-value =  $9.32 \times 10^{-7}$ , BH-  
195 FDR=0.0048, Bonferroni-corrected p-value =  $4.85 \times 10^{-3}$ ), *BCKDK* (uncorrected p-value =  $2.26 \times 10^{-6}$ ,  
196 BH-FDR=0.0058, Bonferroni-corrected p-value = 0.018), and *DHH* (uncorrected p-value =  
197  $2.08 \times 10^{-5}$ , BH-FDR=0.0361, Bonferroni-corrected p-value = 0.108); see [Table 1](#) and  
198 [Supplementary Table S3](#) for further details. When considering all 2801 genes with singleton  
199 missense variants, regardless of constraint, the BH-FDR for gene *DHH* (0.1369) was less  
200 significant, but another gene, *KL*, passed the 10% BH-FDR cut-off (uncorrected p-value =  $1.54 \times 10^{-5}$ ,  
201 BH-FDR=0.0973, Bonferroni-corrected p-value = 0.292) (see [Table 1](#) and [Supplementary Table](#)  
202 [S3](#)). There was no evidence of genome-wide inflation in either analysis (see [Figure 2](#) and  
203 [Supplementary Table S4](#)). When applying the constraint threshold, there was one top-associated  
204 gene that did not meet the 10% BH-FDR threshold and that had somewhat similar results in the  
205 schizophrenia cohort (*OLIG2*: CHD uncorrected p-value =  $1.39 \times 10^{-4}$ , BH-FDR=0.18;  
206 schizophrenia uncorrected p-value = 0.017) (see [Supplementary Table S6](#)), indicating questionable  
207 validity for CHD. For the genes identified without using the constraint threshold, none had a similar  
208 p-value for schizophrenia. Comparing the missense singleton burden in CHD and in gnomAD,  
209 genes *NOTCH1*, *BCKDK*, *DHH*, and *KL* displayed similar p-values, but only *NOTCH1* and

210 *BCKDK* passed the BH-FDR 10% threshold (see [Supplementary Table S5](#) and [Supplementary](#)  
211 [Figure S3](#)). These results suggest that for singleton missense gene burden in this study, there was  
212 no apparent benefit in restricting to missense-constrained genes.

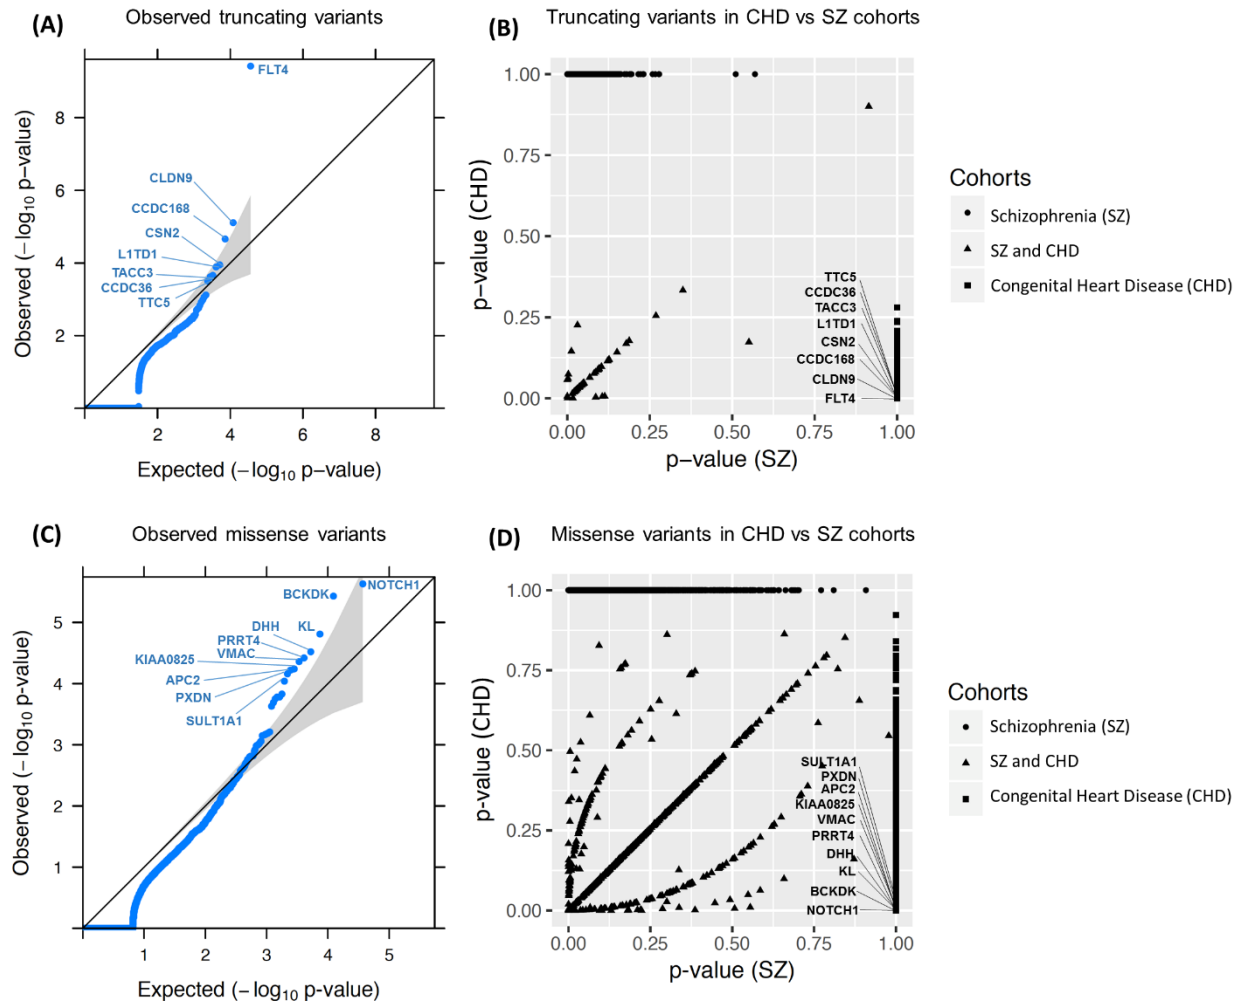

213  
214 **Figure 2) Gene burden analysis results for all genes.** (A) and (C) show the quantile-quantile (QQ) plots  
215 obtained for all ultra-rare truncating and missense variants in CHD, respectively (i.e., not setting any gene  
216 constraint cutoff). The QQ plots represent the scatter plots of the  $-\log_{10}$ (p-value) expected under the null  
217 hypothesis of no genetic association versus the observed  $-\log_{10}$ (p-value) for all 231 CHD samples. Grey  
218 shading indicates the 95% confidence interval. (B) and (D) represent scatter plots of gene burden p-values  
219 for truncating and missense variants respectively, comparing the CHD and schizophrenia WGS data. Names  
220 of the top 8 and 10 genes identified for truncating (A) and missense (C) variants, respectively, are shown  
221 (results for top 6 of each are presented in [Table 1](#)); *FLT4* (A) and *NOTCH1* (C) were the most significant  
222 genes identified, neither with any observation in the comparison schizophrenia cohort (B, D). These plots  
223 were generated based on the genes without constraint on o/e score. [Supplementary Figure S4](#) shows results  
224 for genes with constraint.

225 **Gene-set burden results**

226 Restricting to genes constrained for truncating variants, the gene-set burden analysis (as described  
 227 in the Materials and Methods) identified one cluster for GO and pathways, and one for MPO, both  
 228 of which were significant at the sampling FDR < 10%. The FDR approached 1.0 (non-significant)  
 229 for other clusters (see [Table 2](#)). Gene-set sub-clusters were manually identified with the aid of the  
 230 Cytoscape app EnrichmentMap (13) (see [Table 3](#) and [Supplementary Figure S5](#)). The GO and

231 **Table 2) Top six gene-set clusters for truncating singleton variant burden analyses using Gene**  
 232 **Ontology (GO) / pathways and Mouse Phenotype Ontology (MPO), and restricting to constrained**  
 233 **genes.**

| Gene-set clusters                                                          | Observed truncating variants<br>in constrained genes<br>(o/e score in gnomAD <0.35) | p-value                | Permutation<br>based FDR |
|----------------------------------------------------------------------------|-------------------------------------------------------------------------------------|------------------------|--------------------------|
| <b>GO and pathways</b>                                                     |                                                                                     |                        |                          |
| VEGF signaling and blood vessel development                                | 8                                                                                   | $5.39 \times 10^{-13}$ | 0                        |
| Ion antiporter activity                                                    | 5                                                                                   | 0.0005                 | 0.9564                   |
| Planar cell polarity pathway involved in neural tube closure               | 3                                                                                   | 0.0013                 | 0.9564                   |
| Positive regulation of vascular associated smooth muscle cell migration    | 4                                                                                   | 0.0017                 | 0.9564                   |
| Peptidyl-tyrosine autophosphorylation                                      | 5                                                                                   | 0.0027                 | 0.9564                   |
| Protein quality control for misfolded or incompletely synthesized proteins | 3                                                                                   | 0.0029                 | 0.9564                   |
| <b>MPO</b>                                                                 |                                                                                     |                        |                          |
| Abnormal lymphangiogenesis                                                 | 7                                                                                   | $9.64 \times 10^{-11}$ | 0.008                    |
| Abnormal cranial neural crest cell morphology                              | 3                                                                                   | 0.0010                 | 0.9605                   |
| Neuronal cytoplasmic inclusions                                            | 2                                                                                   | 0.0022                 | 0.9605                   |
| Absent pharyngeal arches                                                   | 4                                                                                   | 0.0031                 | 0.9605                   |
| Abnormal CD5-positive T cell number                                        | 2                                                                                   | 0.0036                 | 0.9605                   |
| Cochlear ganglion degeneration                                             | 4                                                                                   | 0.0037                 | 0.9605                   |

235 pathway cluster (uncorrected p-value =  $5.39 \times 10^{-13}$ , sampling-based FDR = 0) comprised 30 gene-  
236 sets, 20 of which were clearly related to VEGF signaling and/or blood vessel development  
237 (angiogenesis); *FLT4* was by far the most significant gene (LOF variants N = 7, uncorrected p-  
238 value =  $9.56 \times 10^{-12}$ ), with other genes such as *KDR* (LOF variants N = 2, uncorrected p-value =  
239 0.001), *ZFAND5* (LOF variant N = 1, uncorrected p-value = 0.008) and *WNT5A* (LOF variant N =  
240 1, uncorrected p-value = 0.010) having more modest contributions (see [Table 3](#) and [Supplementary](#)  
241 [Tables S7](#) and [S8](#)). The MPO cluster (uncorrected p-value =  $9.64 \times 10^{-11}$ , sampling-based FDR =  
242 0.008) comprised 19 gene-sets, 15 of which corresponded to abnormalities of the cardiovascular  
243 system such as abnormal vessel morphology and cardiac-related bleeding in mice (see [Table 3](#) and  
244 [Supplementary Table S9](#) and [S10](#)). Again, *FLT4* encoding VEGFR3 was the largest contributor,  
245 with other genes in the VEGF pathway including *KDR* encoding VEGFR2 and *FOXO1* (LOF N =  
246 1, uncorrected p-value = 0.008) that were previously identified using manual curation (6). The GO  
247 pathway and MPO cluster results however also identified other potential candidate genes for TOF  
248 associated with functions of *FLT4* that were not identified in the previous study, including  
249 *AKAP12*, *PKD1*, *ATF2*, and *EPN1* ([Table 3](#)). While other clusters were not significant after  
250 multiple test correction, some top-scoring ones had a clear functional or phenotypic relation to  
251 CHD (for instance, planar cell polarity in neural tube closure, ranking third for GO and pathways;  
252 positive regulation of vascular smooth cell migration, ranking fourth for mouse phenotypes) and  
253 included additional promising candidate genes (e.g., *DVL3*, *KIF3A*).

254 Since *FLT4* had such a prominent role in driving the gene-set signal for truncating variants, we  
255 repeated the analysis without *FLT4*. No significant gene-set cluster was identified. Similar results  
256 were obtained when considering all genes (i.e. without restricting to constrained genes), but the  
257 MPO cluster had FDR slightly higher than the 10% threshold (see [Supplementary Table S9](#)). For

258 **Table 3) Gene-set sub-clusters derived from the two gene-set clusters with significant truncating**  
 259 **singleton burden from Table 2.**

| Most significant composite gene-set sub-clusters                                                                  | p-value                | Genes <sup>1</sup><br>(contributing number of variants,<br>p-value)                                                                                      |
|-------------------------------------------------------------------------------------------------------------------|------------------------|----------------------------------------------------------------------------------------------------------------------------------------------------------|
| <b>GO and pathways</b>                                                                                            |                        |                                                                                                                                                          |
| Positive regulation of protein kinase C signaling                                                                 | $5.39 \times 10^{-13}$ | <i>FLT4</i> <sup>2</sup> , <i>WNT5A</i> (1, 0.010)                                                                                                       |
| Regulation of protein kinase C signaling                                                                          | $1.17 \times 10^{-12}$ | <i>FLT4</i> <sup>2</sup> , <i>WNT5A</i> (1, 0.010),<br><i>AKAP12</i> (1, 0.024)                                                                          |
| VEGF and related pathways, and transmembrane receptor protein kinase activity                                     | $1.68 \times 10^{-12}$ | <i>FLT4</i> <sup>2</sup> , <i>KDR</i> <sup>3</sup> (2, 0.001)                                                                                            |
| Regulation of blood vessel remodeling, VEGFR3 signaling in lymphatic endothelium, and lung alveolus development   | $4.70 \times 10^{-10}$ | <i>FLT4</i> <sup>2</sup>                                                                                                                                 |
| Lymph vessel morphogenesis and development                                                                        | $6.73 \times 10^{-9}$  | <i>FLT4</i> <sup>2</sup> , <i>PKDI</i> (1, 0.046)                                                                                                        |
| Respiratory system process and gaseous exchange                                                                   | $4.73 \times 10^{-8}$  | <i>FLT4</i> <sup>2</sup> , <i>ZFAND5</i> (1, 0.008)                                                                                                      |
| Endothelial cell proliferation and migration                                                                      | $6.45 \times 10^{-7}$  | <i>FLT4</i> <sup>2</sup> , <i>KDR</i> <sup>3</sup> (2, 0.001),<br><i>WNT5A</i> (1, 0.010)                                                                |
| <b>MPO</b>                                                                                                        |                        |                                                                                                                                                          |
| Anterior cardinal vein development, abnormal lymph circulation, abnormal lymphatic system physiology, and ascites | $9.64 \times 10^{-11}$ | <i>FLT4</i> <sup>2</sup>                                                                                                                                 |
| Abnormal lymphangiogenesis and abnormal lymphatic vessel morphology                                               | $1.55 \times 10^{-10}$ | <i>FLT4</i> <sup>2</sup> , <i>KDR</i> <sup>3</sup> (2, 0.001)                                                                                            |
| Heart hemorrhage                                                                                                  | $4.20 \times 10^{-7}$  | <i>FLT4</i> <sup>2</sup> , <i>KDR</i> <sup>3</sup> (2, 0.001),<br><i>ATF2</i> (1, 0.036), <i>PKDI</i> (1, 0.046)                                         |
| Hemopericardium                                                                                                   | $2.33 \times 10^{-6}$  | <i>FLT4</i> <sup>2</sup> , <i>ATF2</i> (1, 0.036),<br><i>PKDI</i> (1, 0.046)                                                                             |
| Skin edema and hydrops fetalis                                                                                    | $5.84 \times 10^{-5}$  | <i>FLT4</i> <sup>2</sup> , <i>PKDI</i> (1, 0.046)                                                                                                        |
| Abnormal vitelline vascular remodeling                                                                            | $2.41 \times 10^{-4}$  | <i>FLT4</i> <sup>2</sup> , <i>KDR</i> <sup>3</sup> (2, 0.001),<br><i>FOXO1</i> <sup>3</sup> (1, 0.008),<br><i>EPN1</i> (1, 0.015), <i>TTN</i> (1, 0.740) |

260 <sup>1</sup> Genes listed are all those meeting the constraint threshold of o/e less than 0.35, e.g., including genes not reaching  
 261 significance (e.g., *TTN*).

262 <sup>2</sup> For each significant gene-set subcluster, for gene *FLT4* the number of variants contributing is 7, and the p-value is  
 263  $9.56 \times 10^{-12}$ .

264 <sup>3</sup> Candidate genes previously identified through manual curation methods, relevant to the VEGF pathway, in addition  
 265 to *FLT4* (6).

266 the missense variant analysis, we observed no significant gene-sets, with or without applying the

267 constraint cut-off (see [Supplementary Table S11 and S12](#)).

268 **Detailed *in-silico* analysis of missense variants in *NOTCH1* and other genes**

269 Given that our previous report had focused on truncating variants<sup>6</sup>, we reviewed in detail the  
270 singleton missense variants identified, considering amino acid conservation in orthologous  
271 vertebrate sequences and *in-silico* predictors (SIFT, PolyPhen2, and Mutation Assessor) (14–16).  
272 For *NOTCH1*, this manual review deemed 7 of the 8 ultra-rare missense variants to be either likely  
273 deleterious (n=6) or potentially deleterious (n=1). For *BCKDK*, 1 of 4 was likely deleterious, and  
274 1 of 4 potentially deleterious; for *KL*, 3 of 4 were potentially deleterious; for *DHH*, 1 of 3 was  
275 likely deleterious and 1 of 3 potentially deleterious; see [Supplementary Table S13](#) for details).

276 All 8 *NOTCH1* variants identified reside in the extracellular domain of the encoded protein (amino  
277 acids 19-1735, see [Figure 3](#)), compared to 958 of 1,413 gnomAD v2.1 ultra-rare missense variants  
278 (one-sided Fisher's Exact Test p-value = 0.045, odds ratio = +Inf). Similar to previously reported  
279 exome sequencing findings (8), four of these 8 variants alter evolutionarily conserved cysteine  
280 residues that establish disulfide bonds, located within the EGF-like repeats or the LNR (Lin12-  
281 Notch) domain (17,18). This represents highly significant enrichment compared to such variants  
282 from gnomAD v2.1 (23 of 958 variants; one-sided Fisher's Exact Test p-value =  $3.15 \times 10^{-5}$ , odds  
283 ratio = 39.8).

284 Notably, all 8 of the ultra-rare missense variants in *NOTCH1* were identified within the 175  
285 individuals with TOF, representing 4.6% of those studied. There was significant enrichment for  
286 positive family history of CHD compared to the rest of the TOF sample (4 of 8 probands; two-  
287 sided Fisher's Exact Test p-value = 0.003431, odds ratio = 11.49). Details of phenotype and family  
288 history are provided for individuals with these 8 *NOTCH1* and 12 other variants in [Supplementary](#)  
289 [Table S14](#).

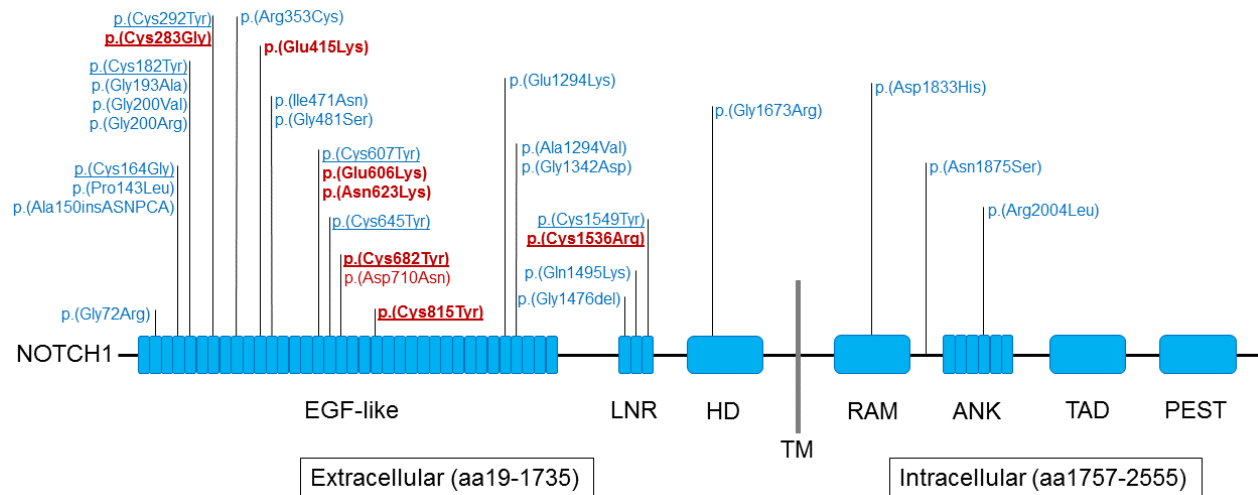

290  
291 **Figure 3) Schematic representation of *NOTCH1* domains (<https://www.uniprot.org/uniprot/P46531>)**  
292 **and rare variants identified in individuals with tetralogy of Fallot.** Findings from the current study  
293 involving 8 of 175 probands with TOF are indicated in red font; 24 ultra-rare missense variants from the  
294 Page et al. study (8) are indicated in blue font. The seven ultra-rare missense *NOTCH1* variants deemed to  
295 be either likely deleterious (n=6) or potentially deleterious (p.(Asn623Lys)) are indicated in bold red font  
296 (details in [supplementary Table S13](#)). Underline indicates those variants that alter evolutionarily conserved  
297 cysteine residues; eight located within the EGF-like repeats domain and two in the LNR (Lin12-Notch)  
298 domain. Abbreviations: aa, amino acid; ANK, ankyrin; EGF, epidermal growth factor; HD,  
299 heterodimerization domain; LNR, Lin/NOTCH repeats; PEST, sequence rich in proline, glutamic acid,  
300 serine, and threonine; RAM, RBP-JK-associated molecule region; TAD, transactivation domain; TM,  
301 transmembrane domain (aa1736-1756).

## 302 **Discussion**

303 In this study, we re-analyzed WGS data available for 231 individuals with CHD, including 175  
304 with TOF, to extend previously published results<sup>6</sup> using a statistical method modified to suit such  
305 case-only data. By rescaling *de novo* mutation probabilities for singleton variants, we adapted a  
306 burden test originally developed for *de novo* variants, and tested truncating and missense singleton  
307 variants separately for increased burden in genes and in functionally relevant gene-sets.

308 Previous results suggested that ultra-rare nonsynonymous variants make an important contribution  
309 to the genetic etiology of CHD, especially to TOF (5,6,8). Since constrained genes may be more  
310 likely to contribute to disease, in order to maximize power, we performed multiple test correction  
311 for all genes, and only for genes passing a constraint threshold. We assessed the validity of our



312 results by ensuring the absence of inflation when considering the burden test p-value distribution.  
313 In addition, we compared burden results for CHD to a schizophrenia WGS data-set processed in  
314 the same way (including variant calling and QC), to help identify potential artifacts. Finally, we  
315 also retested burden by comparing results to gnomAD singletons that had been processed in the  
316 same way with respect to variant effect and singleton definition.

### 317 **Gene burden**

318 Two genes passed a very stringent significance threshold of 0.01 after Bonferroni correction: *FLT4*  
319 for truncating variants and *NOTCH1* for missense variants. Burden significance for these genes  
320 was highly specific to CHD, compared to an unrelated schizophrenia sample, was confirmed by  
321 the gnomAD singleton comparison analysis, and involved only individuals with TOF. The results  
322 are consistent with exome sequencing results from an independent study of 829 individuals with  
323 TOF, analyzed using a different approach, where excess of ultra-rare deleterious variants was  
324 reported to be genome-wide significant (p-value  $\leq 5 \times 10^{-8}$ ) for these two genes (8) and for *FLT4* in  
325 another study restricted to LOF variants (5). These exome sequencing results serve to both help  
326 validate our burden test methodology and provide independent replication, further cementing these  
327 genetic findings for TOF. Collectively, the findings support study designs that focus on TOF.

328 For truncating variants, restricting to constrained genes did not result in identifying any other  
329 significant genes, even when considering a more inclusive significance threshold of BH-FDR <  
330 10%. Including all genes resulted in one other gene that passed BH-FDR < 10%, *CLDN9* (Claudin  
331 9). *CLDN9* burden was not however confirmed by the comparison to gnomAD singleton variants  
332 and the gene lacks evidence for involvement in cardiovascular development, thus at present we  
333 consider this result to be likely artifactual. The results suggest that, in order to limit such artifacts,  
334 considering only LOF-constrained genes may be especially important when a well matched data-



335 set (here, schizophrenia WGS) is not available. For example, artifacts can arise if *de novo* mutation  
336 probabilities are derived from WGS data that were processed differently than the data available for  
337 the case-only cohort (e.g., different variant calling pipeline, QC filters, and principal transcripts).  
338 Also, *denovolyzer* probabilities were generated for exome analysis and adjusted for sequencing  
339 depth, thus artifacts may arise in WGS studies where sequencing depth is greater. In contrast, for  
340 missense variants, testing only genes passing a missense constraint threshold did not appear to be  
341 beneficial. This is perhaps because missense constraint tends to be a characteristic of specific  
342 protein regions rather than the full gene product and this is not adequately modelled by gnomAD  
343 constraint indexes.

344 For ultra-rare missense variants, we identified slightly different sets of significant genes (BH-FDR  
345 < 10%) when considering only constrained genes or all genes. *BCKDK* (Branched-chain keto acid  
346 dehydrogenase kinase) was identified in both analyses; *DHH* (Desert hedgehog signaling  
347 molecule) was identified only in the constrained analysis, and *KL* (Klotho) only in the all-gene  
348 analysis. All displayed a similar p-value in the gnomAD singleton comparison, and only *BCKDK*  
349 passed BH-FDR < 10%. *BCKDK* is a negative regulator of the branched-chain amino acids  
350 catabolic pathways. In mice, complete *BCKDK* loss of function causes reduced size and  
351 neurological abnormalities (19). In humans, recessive *BCKDK* loss of function causes recessive  
352 ‘Branched-chain ketoacid dehydrogenase kinase deficiency’ (OMIM: 614923), characterized by  
353 autism, epilepsy, intellectual disability, and risk of developing schizophrenia (20). Alterations of  
354 branched-chain amino acid metabolism have been described in relation to heart failure (21),  
355 however, there is no evident link between *BCKDK* and CHD. *DHH* is required for Sertoli cells  
356 development and peripheral nerve development: male *Dhh*-null mice are sterile and fail to produce  
357 mature spermatozoa; in addition, peripheral nerves are highly abnormal (22,23). These features are

358 mirrored by the human recessive disorder ‘46XY partial gonadal dysgenesis, with minifascicular  
359 neuropathy’ (OMIM: 607080), whereas the recessive disorder ‘46XY sex reversal 7’ (OMIM:  
360 233420) does not present peripheral nerve abnormalities (24,25). No cardiac abnormalities were  
361 reported for these disorders. However, *DHH* was also proposed to contribute to promoting  
362 ischemia-induced angiogenesis by ensuring peripheral nerve survival (26). In humans, *KL* was  
363 previously proposed as a candidate gene for TOF because of one patient with a broader 13q13  
364 deletion and another patient with a narrower deletion at the same locus disrupting *KL* and *STARD13*  
365 (27,28). Deficiency of *Kl* in mice has profound systemic effects, resulting in a phenotype  
366 reminiscent of human ageing and characterized by reduced lifespan, stunted growth, skeletal  
367 abnormalities, vascular calcification and atherosclerosis, cognitive impairment and other organ  
368 alterations (29). Conversely, over-expression of *Kl* in mice protects against cardiovascular disease.  
369 In addition, *Kl* is involved in the regulation of several pathways, including VEGF and Wnt (30).  
370 However, considering the evidence reviewed above and that these three genes present a lower  
371 fraction of singleton predicted deleterious missense variants compared to *NOTCH1*, caution is  
372 needed when considering these genes as candidates for CHD/TOF. Replication in larger cohorts  
373 and/or experimental follow-up is required.

#### 374 **Functional gene-sets and candidate genes**

375 Since constrained genes would be expected to have a low rate of ultra-rare variation and thus  
376 present power challenges in a cohort of this size, in addition to assessing variants by gene, we also  
377 pooled variants by functional gene-sets and mouse ortholog phenotypes. To correct for strong  
378 correlations introduced by highly overlapping gene-sets, which may result in inflated significance  
379 after multiple test correction, we used a greedy clustering procedure to group highly overlapping  
380 gene-sets; we then performed multiple test correction using a sampling-based FDR. Reassuringly,

381 given our previously published results (6), the gene-set burden analysis for truncating singleton  
382 variants yielded a cluster corresponding to the VEGF pathway and blood vessel development (FDR  
383 = 0), and also a cluster corresponding to abnormal vasculature (FDR = 0.008). As expected (6),  
384 *FLT4* was the main gene driving these results. We additionally identified other genes that were  
385 only nominally significant, but had suggestive functional or phenotypic evidence and could achieve  
386 genome-wide significance in a larger cohort.

387 Although we had previously identified some of these genes (*KDR* and *FOXO1*) (6), *WNT5A* (Wnt  
388 family member 5A) and *ZFAND5* (zinc finger AN1-type containing 5), were identified only in this  
389 re-analysis and appear particularly promising candidates for TOF/CHD. *ZFAND5* is  
390 transcriptionally activated by the platelet-derived growth factor (PDGF) pathway (31), and is  
391 reported to be a member of the FoxO family signaling pathway by the NCI-Nature PID pathway  
392 database. Mice homozygous for a *Zfand5* null mutation die postnatally due to widespread bleeding,  
393 caused by loss of vascular smooth muscle cells (31). Mice homozygous for a *Wnt5a* null allele die  
394 perinatally, with reduced growth and multiple organ system developmental abnormalities; notably,  
395 the heart presents outflow tract defects and *Wnt5a* loss disrupts second heart field cell deployment;  
396 heterozygous mice are apparently normal (32–34). Functional experiments in mice showed that  
397 *Wnt5a* contributes to the vascular specification of cardiac progenitor cells and a role in pressure  
398 overload-induced cardiac dysfunction (35,36). In humans, heterozygous missense or homozygous  
399 loss of function variants in *WNT5A* are associated with ‘Robinow syndrome’ (OMIM: 180700)  
400 (37), which is characterized by short stature, macrocephaly, delayed bone age and limb shortening,  
401 reproductive system and kidney abnormalities (38). CHD and specifically right ventricular outlet  
402 obstruction are present in a fraction of the cases (39). The results also suggested other constrained  
403 genes not previously identified, with evidence that supports a role in the VEGF pathway or other

404 complementary mechanisms for TOF, from human (e.g., *AKAP12*), mouse (e.g., *EPN1*, *ATF2*) or  
405 both (*PKDI*) (Table 3) derived gene-sets (40–44).

406 We note that, collectively, genes *NOTCH1*, *FLT4*, *ZFAND5* and *WNT5A* present singleton variants  
407 in probands with TOF but no other-CHD, representing significant enrichment (Fisher test two-  
408 sided p-value = 0.01494) compared to background total sample. These account in total for about  
409 11% of the individuals with TOF studied (see Supplementary Table 14).

410 One may wonder why certain VEGF pathway genes that were previously implicated in TOF using  
411 manual curation of this data-set (6) were not found in the gene-set analysis in the current study.  
412 There are several possible reasons. *BCARI* was implicated by structural variation (thus not  
413 analyzed in the current study), *VEGFA* does not have a defined *de novo* mutation probability in  
414 *denovolyzer*, *FGD5* and *PRDMI* are not associated to any VEGF-related gene-sets among the GO  
415 and pathway gene-sets used for this analysis, and *IQGAP1* was present only in a VEGF-related  
416 gene-set that did not contain *FLT4* and thus did not achieve significance. If these genes were also  
417 included, this would account for around 14% TOF individuals.

#### 418 **Advantages and limitations**

419 Results from several published studies suggest that analyzing ultra-rare variant burden is a suitable  
420 strategy for CHD, and especially for TOF (5,6,8), given a genetic architecture characterized by rare  
421 variants of large effect, reduced penetrance and oligogenic contributions. The method we adopted  
422 enables testing of ultra-rare genetic variant burden in a case-only cohort, without having access  
423 either to parents to determine variant *de novo* status or to matched controls for case-control  
424 analysis. This would be a relatively common circumstance for many studies, especially of rare and  
425 under-funded conditions.

426 In our study design, we attempted to address issues that can produce artifacts, such as mismatch of  
427 the variant calling, and/or processing pipelines, between those used for the disease data-set and for  
428 the data-set supporting the calculation of *de novo* probabilities. We had the advantage of access to  
429 a similarly sized sequencing data-set for an unrelated disease, processed in the same way, to aid in  
430 identifying potential artifacts that may not be available for future applications of this statistical  
431 burden method. Although we observed that restricting the burden analysis to genes constrained for  
432 truncating variants may help minimize such artifacts, there was no apparent advantage using  
433 constraint for missense variants, and we note that the findings may be disease or study specific.

434 Our primary gene burden analysis was based on *de novo* mutation probabilities rescaled to match  
435 incidence of singleton variants, with probabilities defined separately for truncating and missense  
436 variants. As a further confirmatory analysis to the unrelated cohort with similar WGS data, we  
437 compared the singleton burden in CHD to that in gnomAD. Additional analyses using a benchmark  
438 are required to establish whether one of these two methods is superior, in terms of power and  
439 minimizing artifacts. The advantage of using gnomAD singletons is that, while variant calling  
440 pipelines cannot be matched, other downstream processes like annotation can be matched to the  
441 disease data-set of interest.

442 All results were limited by the size of the cohort available with WGS data. There were also  
443 limitations to the design that are applicable to all analyses using gene-sets, including the lag in  
444 updating bioinformatics databases (45) such as GO and MPO. These limitations could have had an  
445 impact on that fact that there was no significant gene-set identified for missense variants. Also,  
446 although the method identified highly relevant gene-set clusters for singleton truncating variants,  
447 *FLT4* played a disproportionately large role in the analysis, likely influencing the fact that the  
448 relatively few novel candidate genes identified largely converged on the VEGF pathway. For other

449 disorders that are even more genetically heterogeneous, the results suggest that optimizing the  
450 analysis method at the gene-set level may be essential in order to identify significant results (45,46).  
451 As for all studies using statistical methods to identify potential disease candidate genes, additional  
452 experimental work would be required to conclusively implicate genes.

453 Sample size limitations, and the genetic architecture of TOF, also likely influenced the gene-based  
454 analysis findings. Nonetheless, two genes passed a stringent Bonferroni correction, *FLT4*  
455 (implicated by truncating variants) and *NOTCH1* (implicated by missense variants), consistent with  
456 previous findings reported in two (5,8) and one (8) independent exome sequencing studies,  
457 respectively. Notably, results of the current study indicated higher yields of ultra-rare variants in  
458 these genes, perhaps related to differences in design and methods, including sequencing (WGS)  
459 expected to have more uniform and complete coverage of coding regions, and perhaps the use of  
460 an adult sample that would enrich for variants associated with survival. Future meta-analyses using  
461 this and other data-sets, or studies using genetically relevant subsets of patients to reduce  
462 heterogeneity, could reveal additional candidate genes with rare variants for TOF. In particular,  
463 several gene-set clusters did not pass the multiple test correction yet appeared highly promising,  
464 and could achieve significance in an expanded cohort.

465 Non-coding variants and structural variants, which can be detected using whole genome data (47),  
466 were not studied. For rare non-coding variants, access to large samples of whole genome data may  
467 offer interesting opportunities, especially if analyzing better understood functional elements like  
468 promoters. The lack of a published mutation probability model for promoters could be  
469 circumvented by performing only the gnomAD comparison analysis. For structural variants,  
470 although reliably detectable using WGS (in contrast to exome sequencing), lack of a *de novo*

471 mutation model, and greater variability in variant calling pipelines, would prevent a direct gnomAD  
472 comparison and represent major barriers at present.

### 473 **Conclusions**

474 The gene burden analysis method used, including a stringent Bonferroni correction, confirmed that  
475 genes *FLT4* with ultra-rare truncating variants, and *NOTCH1* with ultra-rare deleterious missense  
476 variants, are implicated in the etiology of TOF. The significant enrichment of *NOTCH1* missense  
477 variants in the extracellular domain, and specifically altering cysteine residues forming disulfide  
478 bonds, was also confirmed. Despite the small sample size, gene-set analysis identified ultra-rare  
479 truncating variants in novel candidate genes, including *ZFAND5* and *WNT5A*, as potentially  
480 implicated in the etiology of TOF. Other novel genes identified provide further confidence in the  
481 importance of the VEGF pathway to TOF. While several of these candidate genes are compelling,  
482 with supportive data from known functions and animal model phenotype, additional experimental  
483 work and/or replication in other data-sets are required to appreciate their potential role in the  
484 etiology and pathogenesis of TOF.

### 485 **Materials and Methods**

#### 486 **Study participants and genome sequencing**

487 This study was authorized by the Research Ethics Boards at the University Health Network (REB  
488 98-E156) (<http://www.uhn.ca>), and Centre for Addiction and Mental Health (REB 154/2002)  
489 (<http://www.camh.ca>). Written consent was obtained from all participants or their legal guardians.  
490 We performed genome sequencing on 231 probands (175 TOF, 49 transpositions of the great  
491 arteries, 7 other CHD). DNA was sequenced on the Illumina HiSeq X system ([https://www.illumina-](https://www.illumina.com/systems/sequencing-platforms/hiseq-x.html)  
492 [a.com/systems/sequencing-platforms/hiseq-x.html](https://www.illumina.com/systems/sequencing-platforms/hiseq-x.html)) at The Centre for Applied Genomics (TCAG)

493 (<http://www.tcag.ca>). Libraries were amplified by PCR prior to sequencing. Libraries were  
494 assessed using Bioanalyzer DNA High Sensitivity chips and quantified by quantitative PCR using  
495 Kapa Library Quantification Illumina/ABI Prism Kit protocol (KAPA Biosystems). Validated  
496 libraries were pooled in equimolar quantities and paired-end sequenced on an Illumina HiSeq X  
497 platform following Illumina's recommended protocol to generate paired-end reads of 150 bases in  
498 length.

#### 499 **Variant Calling, Annotation, and Truncating and Missense Variant extraction**

##### 500 Variant Calling

501 The paired FASTQ reads were mapped to the GRCh37 reference sequence using the BWA-  
502 backtrack algorithm (v0.7.12), and SNV and small indel variants were called using GATK (v3.7)  
503 according to GATK Best Practices recommendations (48,49).

##### 504 Variant Annotation

505 Variant calls were annotated using a custom pipeline based on ANNOVAR (July 2017 version)  
506 (50). Allele frequencies were derived from 1000 genomes (Aug. 2015 version) (51), ExAC (Nov.  
507 2015 version) (7), and gnomAD (Mar. 2017 version) (52).

##### 508 Classification of variants by truncating and missense effect

509 Truncating variants (labelled as *LOF* for *loss of function*) comprised frameshift  
510 insertions/deletions, alterations of the highly conserved intronic dinucleotide at splice sites and  
511 substitutions creating a premature stop codon (stop gain). Missense variants are substitutions of  
512 amino acids.



513 **Variant filters based on quality, allele frequency and effect**

514 Allele frequency and singleton filter

515 The burden test adopted in this study was originally developed for *de novo* variants, but we argue  
516 that ultra-rare variants are not present in the general population and are likely to have arisen  
517 recently from *de novo* mutations transmitted to the progeny. We defined ultra-rare singleton  
518 variants as appearing only once in the CHD WGS data-set and never in population reference data-  
519 sets (1000 genomes, ExAC, and gnomAD).

520 Low quality filter

521 We removed variants deemed to be low quality, which met at least one of these criteria: (i) low  
522 sequencing depth ( $DP \leq 10$ ); (ii) low alternate allele read fraction or low genotype quality (for  
523 heterozygous variants,  $alt\_fraction < 0.3$  or  $GQ \leq 99$ , for homozygous variants,  $alt\_fraction < 0.8$   
524 or  $GQ \leq 25$ ).

525 Frameshift indel filter

526 For each subject, whenever we found multiple indels on the same gene, we removed them from the  
527 variants list if their cumulative size was a multiple of 3. Otherwise, we kept one of the indels as a  
528 representative and removed the rest.

529 Splice site alteration filter

530 For insertions overlapping splice sites, we considered them as truncating variants only if the  
531 alternate allele sequence did not encode a canonical AG/GT intronic dinucleotide.

532 Principal transcript effect filter

533 We used the APPRIS database (assembly version: GRCh37, gene dataset: RefSeq105, Oct. 2018)  
534 to identify principal transcript isoforms (53) and retained only variants with an effect on a principal  
535 transcript. APPRIS principal transcript identification is based on conservation, presence of protein  
536 domains and other coding sequence characteristics.

### 537 Final singleton counts

538 We considered maximum only one singleton missense or truncating variant per gene per subject,  
539 such that, for each variant type, the count of singleton variants in a given gene equals the count of  
540 subjects with at least one singleton variant in that given gene.

### 541 **Gene burden analysis**

#### 542 De novo mutation probabilities

543 We obtained *de novo* mutation probabilities for each gene from denovolyzeR ([http://denovo-](http://denovolyzer.org/)  
544 [lyzer.org/](http://denovolyzer.org/)) (54). 1000 Genomes intergenic regions that are orthologous between humans and  
545 chimps were used to derive mutation probabilities. The probabilities were based on substitution  
546 type, trinucleotide context and other genome structure characteristics; in addition, they were  
547 adjusted for exome sequencing depth (55).

#### 548 Rescale de novo mutation probability for singleton variants

549 Since the original mutation probabilities were estimated for *de novo* variants, we applied a  
550 multiplicative global scaling factor (SF), defined in equation [1], to obtain new rescaled  
551 probabilities  $P_{exp,(LOF\ or\ Missense),g}$ ; the scaling factor  $SF$  is computed so that the number of  
552 predicted and observed singleton variants match.

$$553 \quad SF = \frac{N_{Obs,(LOF\ or\ Missense)}}{\sum_{g=1,\dots,G}(P_{exp,(LOF\ or\ Missense),g}) * NS} \quad [1]$$

554 where  $N_{Obs,(LOF\ or\ Missense),g}$  is the number of all observed truncating or missense singleton  
555 variants; the denominator corresponds to the number of expected singletons using the original  
556 unscaled probabilities:  $G$  is the total number of genes for which there is a defined mutation  
557 probability (and optionally, that pass gnomAD constraint cut-offs);  $P_{exp,(LOF\ or\ Missense),g}$  is the  
558 expected *de novo* mutation probability for gene  $g$  with respect to truncating or missense variants;  
559 and  $N_S$  is the number of subjects in the study.

560 Binomial test

561 Singleton truncating and missense burden was tested using a one-sided binomial test comparing  
562 observed to expected singleton rates, where expected singleton rates correspond to the rescaled  
563 mutation probabilities. The alternative hypothesis is defined as  $P_{success} > N_{success}/N_{trials}$ , i.e. that the  
564 observed singleton rate for a given gene exceeds the expected rate based on rescaled mutation  
565 probabilities.

566

$$567 \begin{cases} P_{Success} = P_{exp,(LOF\ or\ Missense),g} * SF \\ N_{trials} = N_S \\ N_{Success} = N_{Obs,(LOF\ or\ Missense),g} \end{cases} \quad [2]$$

568

569 where  $N_{Obs,(LOF\ or\ Missense),g}$  denotes the number of observed truncating or missense singleton  
570 variants for gene  $g$ . Note that, for simplicity, we used singleton variant counts in equation [2], but  
571 since we considered maximum only one singleton truncating or missense variant per subject per  
572 gene, the singleton truncating or missense variant count per gene is equivalent to the count of  
573 subjects with at least one truncating or missense singleton variant in that gene.

574 gnomAD comparison analysis

575 SNVs and indels data were obtained from the gnomAD v2.1.1 database, comprising WES (125,748  
576 subjects) and WGS (15,708 subjects), after restricting to the interval list ([hg19-v0-  
577 wgs\\_evaluation\\_regions.v1.interval\\_list](#)) used to generate the Exome Calling Intervals VCF file  
578 ([gnomad.genomes.r2.1.1.exome\\_calling\\_intervals.sites.vcf.bgz](#)). Singleton variants were  
579 identified by using the allele counts provided in the gnomAD VCF file. Singletons were annotated  
580 using the same ANNOVAR-based pipeline, followed by the same effect filters as in the main  
581 analysis (including the selection of the same principal transcript) and finally categorized as  
582 truncating or missense. Genes were tested for singleton burden by comparing CHD WGS  
583 singletons to gnomAD singletons using a two-sided Fisher's Exact Test, and specifically by  
584 constructing the 2×2 contingency matrix with counts: (a) CHD singletons in the gene of interest,  
585 (b) CHD singletons in other genes, (c) gnomAD singletons in the gene of interest, (d) gnomAD  
586 singletons in other genes; truncating and missense singletons were tested separately. For CHD,  
587 only maximum one singleton per subject was considered (as in the main analysis).

#### 588 Multiple test correction

589 For gene burden analyses, multiple test correction was performed using the Benjamini-Hochberg  
590 False Discovery Rate (*BH-FDR*), as implemented in the R function *p.adjust*, and Bonferroni  
591 correction, by multiplying the p-value by the number of genes tested. For both corrections, we  
592 considered all genes with a defined probability, or all genes with a defined probability and passing  
593 constraint cut-offs (o/e gnomAD score < 0.35 for truncating variants and o/e gnomAD score < 0.75  
594 for missense variants).

#### 595 **Gene-set burden analysis**

#### 596 Gene-set resources

597 Gene-sets were derived from Gene Ontology (GO) annotations as provided by the Bioconductor  
598 package org.Hs.eg.db v3.5 (9), BioCarta pathways ([http://cgap.nci.nih.gov/Pathways/BioCarta-](http://cgap.nci.nih.gov/Pathways/BioCarta-Pathways/)  
599 [Pathways/](http://cgap.nci.nih.gov/Pathways/BioCarta-Pathways/)), KEGG pathways (<http://www.genome.jp/kegg/>) retrieved using the KEGG API (10),  
600 REACTOME pathways (11), and National Cancer Institute (NCI) pathways ([https://cactus.nci.nih-](https://cactus.nci.nih.gov/download/nci/)  
601 [.gov/download/nci/](https://cactus.nci.nih.gov/download/nci/)). Gene-sets corresponding to phenotypes of mouse orthologues were derived  
602 from MPO gene annotations as provided by MGI (12).

### 603 Gene-set filters

604 We retained only the gene-sets with more than 5 genes and less than 100. Smaller gene-sets are  
605 detrimental for power. Larger gene-sets are usually removed because they are overly general.  
606 Considering the specific gene-level burden signal distribution observed for this data-set,  
607 characterized by the presence of two “highly concentrated” burden genes (*FLT4* and *NOTCH1*),  
608 some larger gene-sets could exceed the expected singleton rate just because of the presence of one  
609 of these two genes. In addition, larger gene-sets are less suitable for the binomial test strategy, since  
610 they are more likely to present with more than one singleton variant per subject and to contain  
611 genes with heterogeneous mutation probabilities, which is detrimental when pooling counts (13).  
612 For the analyses using a given gene constraint cut-off, we removed gene-sets with less than two  
613 genes passing the constraint cut-offs.

### 614 Binomial Test

615 For the gene-set analysis, we used a binomial test (equation [3]) to compare the number of observed  
616 and expected singleton variant in the gene-set, similar to the gene burden analysis. We additionally  
617 ensured not to count more than one truncating or missense singleton per gene-set per subject.

$$618 \quad \begin{cases} P_{Success} = \sum_{g \in GeneSet} P_{exp,(LOF \text{ or } Missense),g} * SF \\ N_{trials} = N_S \\ N_{Success} = \sum_{S=1, \dots, S} \min(\sum_{g \in GeneSet} N_{Obs,(LOF \text{ or } Missense),g,S}, 1) \end{cases} \quad [3]$$

619 where *GeneSet* represents the set of all genes in a particular gene-set; *S* are the study subjects; and  
620  $N_{Obs,(LOF \text{ or } Missense),g,S}$  is the number of observed missense or truncating singleton variants in a  
621 particular gene for subject *S*.

### 622 Greedy step-down aggregation method to correct for gene-set correlations

623 We addressed the problem of gene-set correlations, which are introduced by large gene overlaps  
624 between related gene-sets, by using a greedy step-down clustering approach, similar to what was  
625 adopted for highly correlated CNV locus gene testing in the *Marshall et al.* study (46). The  
626 algorithm follows these steps, starting from an input list of gene-sets sorted by the singleton burden  
627 binomial p-value:

- 628 1) Select the gene-set with the most significant p-value (i.e. the smallest p-value);
- 629 2) Identify other gene-sets that are highly correlated to the selected gene-set, using the *Jaccard*  
630 similarity:

$$631 \quad \frac{|gs_i \cap gs_j|}{|gs_i \cup gs_j|} \quad [4]$$

632 where  $gs_i$  and  $gs_j$  are the sets of singleton variants for gene-sets *i* and *j*, respectively.  $| \quad |$   
633 is the number of singleton variants in the corresponding set.

- 634 3) Cluster gene-sets that have *Jaccard* similarity  $> 0.5$  with the selected gene-set; these gene-  
635 sets will not be considered for the multiple test correction calculation, only the selected  
636 gene-set will be used (i.e. the p-value from the selected gene-set will be used as the p-value  
637 for the gene-set cluster). Finally, remove the selected gene-set and its clustered gene-sets  
638 from the sorted list.

639 Steps 1-3 are executed until no gene-set is left in the list.

## 640 **Resampling-based FDR**

641 Observed missense or truncating singleton variants are resampled based on each gene's rescaled  
642 mutation probability (equation [1]), while maintaining the same total number of observed missense  
643 or truncating singleton variants. After this step, gene-sets are tested as described in the previous  
644 section. Finally, for each given p-value threshold  $p$ , the FDR is calculated as follows, considering  
645 only gene-sets selected by the greedy step-down aggregation procedure:

$$646 \quad FDR_p = \frac{\text{mean}_{i=1, \dots, 1000}(N_{gs}^{\text{permutation}_i})}{N_{gs}^{\text{real}}} \quad [5]$$

647 where  $FDR_p$  is the FDR q-value for a given p-value threshold  $p$ ,  $N_{gs}^{\text{real}}$  is the number of gene-  
648 sets with binomial p-value  $\leq p$ , and  $N_{gs}^{\text{permutation}_i}$  corresponds to the number of gene-sets with  
649 binomial p-value  $\leq p$  at iteration  $i$ . As stated in the formula, we used 1,000 sampling iterations.

## 650 **Acknowledgments**

651 We thank the patients and their families for participating in this study.

## 652 **Funding**

653 This work was funded by a generous donation from the W. Garfield Weston Foundation (A.S.B.),  
654 and in part by operating grants from the Canadian Institutes of Health Research (MOP-89066) and  
655 University of Toronto McLaughlin Centre (A.S.B.), and support from the Ted Rogers Centre for  
656 Heart Research. E.O. holds the Bitove Family Professorship of Adult Congenital Heart Disease.  
657 S.W.S. is funded by the GlaxoSmithKline-CIHR Chair in Genome Sciences at the University of  
658 Toronto and The Hospital for Sick Children. A.S.B. holds the Dalglish Chair in 22q11.2 Deletion  
659 Syndrome at the University Health Network and University of Toronto.

660 **Legends to Supplementary Figures and Tables**

661 **Supplementary Figures**

662 **Supplementary Figure 1**

663 **Relation between gnomAD genetic constraint indexes.**

664 (A) Relationship between pLI (x axis, discretized in three bins) and the ratio of observed/expected (o/e)  
665 truncating variants (y axis). pLI > 0.9 has often been used as haploinsufficiency cutoff for clinical variant  
666 interpretation, and gnomAD suggests using the upper bound of the o/e confidence interval < 0.35 for a  
667 similar use. We preferred using a point estimate  $\leq 0.35$  to be more inclusive, i.e. including genes with  
668 more moderate haploinsufficiency. For our analysis, we have considered genes with o/e score < 0.35. (B)  
669 Relationship between the missense constraint z-score (x axis, discretized in two bins) and the ratio of  
670 observed/expected missense variants (y axis). For our analysis, we have considered genes with o/e score <  
671 0.75, which roughly corresponds to a z-score > 2, which in turn corresponds to a constraint p-value of  
672 0.02275.

673

674 **Supplementary Figure 2**

675 **Relation between the number of singleton truncating variants per gene in the CHD data-set and in**  
676 **gnomAD.**

677 The distribution (across genes) of the number of singleton truncating variants per gene is shown as an  
678 overlaid boxplot and violin plot for singletons in gnomAD (x axis), stratified by the the number of  
679 singleton variant in the CHD data-set (y axis); each dot represents a gene. The dashed line represents the  
680 linear regression predictions, which are appear unreliable because of outliers and the small number of  
681 unique CHD singleton counts. Only *FLT4* has 7 truncating singletons, but the trend for other strata  
682 suggests that this is in large excess of singletons observed in gnomAD. Note that CHD singletons are not  
683 observed in gnomAD, whereas gnomAD singletons are observed only once in gnomAD.

684

685 **Supplementary Figure 3**

686 **Relation between the number of singleton missense variants per gene in the CHD data-set and in**  
687 **gnomAD.**

688 The distribution (across genes) of the number of singleton missense variants per gene is shown as an  
689 overlaid boxplot and violin plot for singletons in gnomAD (x axis), stratified by the the number of  
690 singleton variant in the CHD data-set (y axis); each dot represents a gene. The dashed line represents the  
691 linear regression predictions, which appear robust. *KL* and *DHH* overlap with the lowest percentiles of the  
692 distribution, whereas *BCKDK* is lower than any observed value; only *NOTCH1* has 8 missense singletons,  
693 but the trend for other strata suggests that this is in excess of singletons observed in gnomAD. Note that  
694 CHD singletons are not observed in gnomAD, whereas gnomAD singletons are observed only once in  
695 gnomAD.

696

697 **Supplementary Figure 4**

698 **QQ-plots and p-value CHD/SZ scatterplot for the gene burden analysis restricted to constrained**  
699 **genes.**

700 (A) and (C) show the quantile-quantile (QQ) plots for gene burden p-values obtained for truncating  
701 singletons restricted to constrained genes (gnomAD o/e < 0.35, A) or missense singletons restricted to  
702 constrained genes (gnomAD o/e < 0.75, B). Only a few genes present p-values deviating from the null  
703 distribution, suggesting absence of systematic p-value inflation. (B) and (D) show scatterplots of the  
704 nominal p-values obtained for the gene burden analysis of truncating or missense singleton variants in  
705 constrained genes, comparing CHD (y axis) versus schizophrenia (x axis). The most significant genes for  
706 CHD are typically not significant for SZ, suggesting the absence of systematic confounders.

707



708 **Supplementary Figure 5**

709 **Cytoscape enrichment map for the gene-sets with significant burden of singleton truncating variants**  
710 **in constrained genes.**

711 An enrichment map visualizes gene-sets as a network based on their overlaps. Nodes correspond to gene-  
712 sets from the gene-set cluster with significant (FDR < 10%) burden for truncating singleton variants in  
713 constrained genes, and edges correspond to the degree of overlap between gene-sets. Nodes are colored  
714 based on the burden nominal p-value, with darker red corresponding to more significant gene-sets. Edge  
715 thickness is proportional to the jaccard index obtained by considering singleton truncating variants as set  
716 elements; only edges corresponding to jaccard index > 0.5 are displayed. Gene-set sub-clusters are  
717 suggested by automated network layout. Gene Ontology and pathways (A) are shown separately from  
718 mouse phenotypes (B).

719

720 **Supplementary Tables**

721 **Supplementary Table 1**

722 **Ultra-rare singleton variants observed for 231 CHD samples including gnomAD o/e**  
723 **constraint scores**

724

725 **Supplementary Table 2**

726 **Gene burden statistics for CHD singleton truncating variants**

727

728 **Supplementary Table 3**

729 **Gene burden statistics for CHD singleton missense variants**

730

731 **Supplementary Table 4**

732 **Truncating variants observed in both SZ and CHD cohorts**

733

734 **Supplementary Table 5**

735 **Gene burden statistics obtained by comparing CHD singletons to gnomAD singletons and**  
736 **tested using Fisher's Exact Test**

737

738 **Supplementary Table 6**

739 **Missense Variants observed in both SZ and CHD cohorts**

740

741 **Supplementary Table 7**

742 **Burden statistics for GO and pathway gene-set clusters and truncating variants in**  
743 **constrained genes**

744

745 **Supplementary Table 8**

746 **Burden statistics for GO and pathway gene-sets and singleton truncating variants in**  
747 **constrained genes**

748

749 **Supplementary Table 9**

750 **Burden statistics for mouse phenotype gene-set clusters and singleton truncating variants in**  
751 **constrained genes**

752

753

754 **Supplementary Table 10**

755 **Burden statistics for mouse phenotype gene-sets and singleton truncating variants in**  
756 **constrained genes**

757

758 **Supplementary Table 11**

759 **Burden statistics for GO and pathway gene-set clusters and singleton missense variants in**  
760 **constrained genes**

761

762 **Supplementary Table 12**

763 **Burden statistics for GO and pathway gene-sets and singleton missense variants in**  
764 **constrained genes**

765

766 **Supplementary Table 13**

767 **NOTCH1, BCKDK, DHH and KL missense variants details**

768

769 **Supplementary Table 14**

770 **Patient phenotype and family history for selected deleterious missense and truncating**  
771 **variants**

772

773 **References**

774 1. Glidewell J, Grosse SD, Riehle-Colarusso T, Pinto N, Hudson J, Daskalov R, et al. Actions  
775 in Support of Newborn Screening for Critical Congenital Heart Disease — United States,  
776 2011–2018. *MMWR Morb Mortal Wkly Rep.* 2019;68(5):107–11.

777 2. Zaidi S, Brueckner M. Genetics and Genomics of Congenital Heart Disease. *Circ Res.*  
778 2017;120(6):923–40.

779 3. Morgenthau A, Frishman WH. Genetic Origins of Tetralogy of Fallot. *Cardiol Rev.*  
780 2018;26(2):86–92.

781 4. Mercer-Rosa L, Paridon SM, Fogel MA, Rychik J, Tanel RE, Zhao H, et al. 22q11.2  
782 deletion status and disease burden in children and adolescents with tetralogy of Fallot. *Circ*  
783 *Cardiovasc Genet.* 2015;8(1):74–81.

784 5. Jin SC, Homsy J, Zaidi S, Lu Q, Morton S, DePalma SR, et al. Contribution of rare  
785 inherited and de novo variants in 2,871 congenital heart disease probands. *Nat Genet*  
786 [Internet]. 2017 Nov 9;49(11):1593–601. Available from:  
787 <http://dx.doi.org/10.1038/ng.3970>

788 6. Reuter MS, Jobling R, Chaturvedi RR, Manshaei R, Costain G, Heung T, et al.  
789 Haploinsufficiency of vascular endothelial growth factor related signaling genes is  
790 associated with tetralogy of Fallot. *Genet Med* [Internet]. 2019;21(4):1001–7. Available  
791 from: <http://dx.doi.org/10.1038/s41436-018-0260-9>

792 7. Lek M, Karczewski KJ, Minikel E V., Samocha KE, Banks E, Fennell T, et al. Analysis of  
793 protein-coding genetic variation in 60,706 humans. *Nature.* 2016;536(7616):285–91.

794 8. Page DJ, Miossec MJ, Williams SG, Monaghan RM, Fotiou E, Cordell HJ, et al. Whole  
795 Exome Sequencing Reveals the Major Genetic Contributors to Nonsyndromic Tetralogy of

- 796 Fallot. *Circ Res.* 2019;124(4):553–63.
- 797 9. Carlson M. (2019). *org.Hs.eg.db: Genome wide annotation for Human*. R package version  
798 3.8.2. R package version 3.8.2. 2019.
- 799 10. Kanehisa M, Furumichi M, Tanabe M, Sato Y, Morishima K. KEGG: New perspectives on  
800 genomes, pathways, diseases and drugs. *Nucleic Acids Res.* 2017;45(D1):D353–61.
- 801 11. Fabregat A, Jupe S, Matthews L, Sidiropoulos K, Gillespie M, Garapati P, et al. The  
802 Reactome Pathway Knowledgebase. *Nucleic Acids Res [Internet]*. 2018;46(D1):D649–55.  
803 Available from:  
804 <http://www.ncbi.nlm.nih.gov/pubmed/29145629>0A[http://www.pubmedcentral.nih.gov/ar](http://www.pubmedcentral.nih.gov/articlerender.fcgi?artid=PMC5753187)  
805 [ticlerender.fcgi?artid=PMC5753187](http://www.pubmedcentral.nih.gov/articlerender.fcgi?artid=PMC5753187)
- 806 12. Bult CJ, Blake JA, Smith CL, Kadin JA, Richardson JE, Anagnostopoulos A, et al. Mouse  
807 Genome Database (MGD) 2019. *Nucleic Acids Res.* 2019;47(D1):D801–6.
- 808 13. Reimand J, Isserlin R, Voisin V, Kucera M, Tannus-Lopes C, Rostamianfar A, et al.  
809 Pathway enrichment analysis and visualization of omics data using g:Profiler, GSEA,  
810 Cytoscape and EnrichmentMap. *Nat Protoc.* 2019;14(2):482–517.
- 811 14. Vaser R, Adusumalli S, Leng SN, Sikic M, Ng PC. SIFT missense predictions for  
812 genomes. *Nat Protoc [Internet]*. 2016 Jan 3;11(1):1–9. Available from:  
813 <http://www.nature.com/articles/nprot.2015.123>
- 814 15. Ivan A. Adzhubei, Steffen Schmidt, Leonid Peshkin, Vasily E. Ramensky, Anna  
815 Gerasimova, Peer Bork, Alexey S. Kondrashov and SRS. PolyPhen2 original paper.  
816 October. 2010;7(4):248–9.
- 817 16. Reva B, Antipin Y, Sander C. Predicting the functional impact of protein mutations:  
818 Application to cancer genomics. *Nucleic Acids Res.* 2011;39(17):37–43.
- 819 17. Wouters MA, Rigoutsos I, Chu CK, Feng LL, Sparrow DB, Dunwoodie SL. Evolution of  
820 distinct EGF domains with specific functions. *Protein Sci.* 2005;14(4):1091–103.
- 821 18. Gordon WR, Arnett KL, Blacklow SC. The molecular logic of Notch: Biochemical  
822 Perspective. *Cell.* 2009;121(Pt 19):3109–19.
- 823 19. Joshi MA, Jeoung NH, Obayashi M, Hattab EM, Brocken EG, Liechty EA, et al. Impaired  
824 growth and neurological abnormalities in branched-chain  $\alpha$ -keto acid dehydrogenase  
825 kinase-deficient mice. *Biochem J [Internet]*. 2006 Nov 15;400(1):153–62. Available from:  
826 <http://www.biochemj.org/cgi/doi/10.1042/BJ20060869>
- 827 20. Novarino G, El-Fishawy P, Kayserili H, Meguid N a, Scott EM, Schroth J, et al. Mutations  
828 in BCKD-kinase Lead to a Potentially Treatable Form of Autism with Epilepsy. *Science*  
829 (80- ) [Internet]. 2012 Oct 19;338(6105):394–7. Available from:  
830 <http://www.sciencemag.org/cgi/doi/10.1126/science.1224631>
- 831 21. Sun H, Olson KC, Gao C, Prosdocimo DA, Zhou M, Wang Z, et al. Catabolic Defect of  
832 Branched-Chain Amino Acids Promotes Heart Failure. *Circulation [Internet]*. 2016 May  
833 24;133(21):2038–49. Available from:  
834 <https://www.ahajournals.org/doi/10.1161/CIRCULATIONAHA.115.020226>
- 835 22. Bitgood MJ, Shen L, McMahon AP. Sertoli cell signaling by Desert hedgehog regulates

- 836 the male germline. *Curr Biol.* 1996;6(3):298–304.
- 837 23. Parmantier E, Turmaine M, Namini SS, Chakrabarti L, Jessen KR, Mirsky R, et al.  
838 Schwann cell-derived desert hedgehog controls the development of peripheral nerve  
839 sheaths. *Neuron.* 1999;23(4):713–24.
- 840 24. Umehara F, Tate G, Itoh K, Yamaguchi N, Douchi T, Mitsuya T, et al. A novel mutation  
841 of desert hedgehog in a patient with 46, XY partial gonadal dysgenesis accompanied by  
842 minifascicular neuropathy. *Am J Hum Genet.* 2000;67(5):1302–5.
- 843 25. Canto P, Söderlund D, Reyes E, Méndez JP. Mutations in the Desert hedgehog (DHH)  
844 gene in patients with 46,XY complete pure gonadal dysgenesis. *J Clin Endocrinol Metab.*  
845 2004;89(9):4480–3.
- 846 26. Renault MA, Chapouly C, Yao Q, Larrieu-Lahargue F, Vandierdonck S, Reynaud A, et al.  
847 Desert hedgehog promotes ischemia-induced angiogenesis by ensuring peripheral nerve  
848 survival. *Circ Res.* 2013;112(5):762–70.
- 849 27. Costain G, Silversides CK, Marshall CR, Shago M, Costain N, Bassett AS. 13q13.1-q13.2  
850 deletion in tetralogy of Fallot: Clinical report and a literature review. *Int J Cardiol*  
851 [Internet]. 2011;146(2):134–9. Available from:  
852 <http://dx.doi.org/10.1016/j.ijcard.2010.05.070>
- 853 28. Costain G, Lionel AC, Ogura L, Marshall CR, Scherer SW, Silversides CK, et al. Genome-  
854 wide rare copy number variations contribute to genetic risk for transposition of the great  
855 arteries. *Int J Cardiol* [Internet]. 2016;204:115–21. Available from:  
856 <http://dx.doi.org/10.1016/j.ijcard.2015.11.127>
- 857 29. Kuro-o M, Matsumura Y, Aizawa H, Kawaguchi H, Suga T, Utsugi T, et al. Mutation of  
858 the mouse *klotho* gene leads to a syndrome resembling ageing. *Nature* [Internet]. 1997  
859 Nov;390(6655):45–51. Available from: <http://www.nature.com/articles/36285>
- 860 30. Mencke R, Hillebrands JL. The role of the anti-ageing protein *Klotho* in vascular  
861 physiology and pathophysiology. *Ageing Res Rev* [Internet]. 2017;35:124–46. Available  
862 from: <http://dx.doi.org/10.1016/j.arr.2016.09.001>
- 863 31. Schmahl J, Raymond CS, Soriano P. PDGF signaling specificity is mediated through  
864 multiple immediate early genes. *Nat Genet.* 2007;39(1):52–60.
- 865 32. Yamaguchi TP, Bradley A, McMahon AP, Jones S. A *Wnt5a* pathway underlies outgrowth  
866 of multiple structures in the vertebrate embryo. *Development* [Internet].  
867 1999;126(6):1211–23. Available from: <http://www.ncbi.nlm.nih.gov/pubmed/10021340>
- 868 33. Schleiffarth JR, Person AD, Martinsen BJ, Sukovich DJ, Neumann A, Baker CVH, et al.  
869 *Wnt5a* is required for cardiac outflow tract septation in mice. *Pediatr Res.* 2007;61(4):386–  
870 91.
- 871 34. Sinha T, Li D, Théveniau-Ruissy M, Hutson MR, Kelly RG, Wang J. Loss of *Wnt5a*  
872 disrupts second heart field cell deployment and may contribute to OFT malformations in  
873 DiGeorge syndrome. *Hum Mol Genet.* 2015;24(6):1704–16.
- 874 35. Reichman DE, Park L, Man L, Redmond D, Chao K, Harvey RP, et al. *Wnt* inhibition  
875 promotes vascular specification of embryonic cardiac progenitors. *Development.*  
876 2018;145(1):dev159905.

- 877 36. Wang Y, Sano S, Oshima K, Sano M, Watanabe Y, Katanasaka Y, et al. Wnt5a-Mediated  
878 Neutrophil Recruitment Has an Obligatory Role in Pressure Overload-Induced Cardiac  
879 Dysfunction. *Circulation*. 2019;140(6):487–99.
- 880 37. Birgmeier J, Esplin ED, Jagadeesh KA, Guturu H, Wenger AM, Chaib H, et al. Biallelic  
881 loss-of-function WNT5A mutations in an infant with severe and atypical manifestations of  
882 Robinow syndrome. *Am J Med Genet Part A*. 2018;176(4):1030–6.
- 883 38. Person AD, Beiraghi S, Sieben CM, Hermanson S, Neumann AN, Robu ME, et al.  
884 WNT5A mutations in patients with autosomal dominant Robinow syndrome. *Dev Dyn*.  
885 2010;239(1):327–37.
- 886 39. S Atalay, B Ege, A Imamoğlu, E Suskan, B Ocal HG. Congenital heart disease and  
887 Robinow syndrome [Internet]. *Clinical Dysmorphology*; 1993. p. 3. Available from:  
888 <https://europepmc.org/abstract/med/8287182>
- 889 40. Benz PM, Ding Y, Stingl H, Loot AE, Zink J, Wittig I, et al. AKAP12 deficiency impairs  
890 VEGF-induced endothelial cell migration and sprouting. *Acta Physiol*. 2019;(May  
891 2019):1–15.
- 892 41. Wang Y, Hoepfner LH, Angom RS, Wang E, Dutta S, Doeppler HR, et al. Protein kinase  
893 D up-regulates transcription of VEGF receptor-2 in endothelial cells by suppressing  
894 nuclear localization of the transcription factor AP2β. *J Biol Chem*. 2019;294(43):15759–  
895 67.
- 896 42. Villalobos E, Criollo A, Schiattarella GG, Altamirano F, French KM, May HI, et al.  
897 Fibroblast Primary Cilia Are Required for Cardiac Fibrosis. *Circulation*.  
898 2019;139(20):2342–57.
- 899 43. Fearnley GW, Odell AF, Latham AM, Mughal NA, Bruns AF, Burgoyne NJ, et al. VEGF-  
900 A isoforms differentially regulate ATF-2-dependent VCAM-1 gene expression and  
901 endothelial-leukocyte interactions. *Mol Biol Cell*. 2014;25(16):2509–21.
- 902 44. Tessneer KL, Pasula S, Cai X, Dong Y, Mcmanus J, Liu X, et al. Genetic reduction of  
903 vascular endothelial growth factor receptor 2 rescues aberrant angiogenesis caused by  
904 epsin deficiency. *Arterioscler Thromb Vasc Biol*. 2014;34(2):331–7.
- 905 45. Tomczak A, Mortensen JM, Winnenburger R, Liu C, Alessi DT, Swamy V, et al.  
906 Interpretation of biological experiments changes with evolution of the Gene Ontology and  
907 its annotations. *Sci Rep*. 2018;8(1):1–10.
- 908 46. Marshall CR, Howrigan DP, Merico D, Thiruvahindrapuram B, Wu W, Greer DS, et al.  
909 Contribution of copy number variants to schizophrenia from a genome-wide study of  
910 41,321 subjects. *Nat Genet* [Internet]. 2017 Jan 21;49(1):27–35. Available from:  
911 <http://www.nature.com/articles/ng.3725>
- 912 47. Reuter MS, Walker S, Thiruvahindrapuram B, Whitney J, Cohn I, Sondheimer N, et al.  
913 The personal genome project Canada: Findings from whole genome sequences of the  
914 inaugural 56 participants. *Cmaj*. 2018;190(5):E126–36.
- 915 48. Depristo MA, Banks E, Poplin R, Garimella K V., Maguire JR, Hartl C, et al. A  
916 framework for variation discovery and genotyping using next-generation DNA sequencing  
917 data. *Nat Genet*. 2011;43(5):491–501.

- 918 49. Van der Auwera GA, Carneiro MO, Hartl C, Poplin R, del Angel G, Levy-Moonshine A,  
919 et al. From FastQ Data to High-Confidence Variant Calls: The Genome Analysis Toolkit  
920 Best Practices Pipeline. In: *Current Protocols in Bioinformatics* [Internet]. Hoboken, NJ,  
921 USA: John Wiley & Sons, Inc.; 2013. p. 11.10.1-11.10.33. Available from:  
922 <http://doi.wiley.com/10.1002/0471250953.bi1110s43>
- 923 50. Wang K, Li M, Hakonarson H. ANNOVAR: Functional annotation of genetic variants  
924 from high-throughput sequencing data. *Nucleic Acids Res.* 2010;38(16):1–7.
- 925 51. Sudmant PH, Rausch T, Gardner EJ, Handsaker RE, Abyzov A, Huddleston J, et al. An  
926 integrated map of structural variation in 2,504 human genomes. Vol. 526, *Nature*. 2015. p.  
927 75–81.
- 928 52. Karczewski KJ, Francioli LC, Tiao G, Cummings BB, Alföldi J, Wang Q, et al. Variation  
929 across 141,456 human exomes and genomes reveals the spectrum of loss-of-function  
930 intolerance across human protein-coding genes. *bioRxiv* [Internet]. 2019;531210.  
931 Available from: <https://www.biorxiv.org/content/10.1101/531210v1>
- 932 53. Rodriguez JM, Rodriguez-Rivas J, Di Domenico T, Vázquez J, Valencia A, Tress ML.  
933 APPRIS 2017: Principal isoforms for multiple gene sets. *Nucleic Acids Res.*  
934 2018;46(D1):D213–7.
- 935 54. Ware JS, Samocha KE, Homsy J, Daly MJ. Interpreting de novo Variation in Human  
936 Disease Using denovolyzeR. In: *Current Protocols in Human Genetics* [Internet].  
937 Hoboken, NJ, USA: John Wiley & Sons, Inc.; 2015. p. 7.25.1-7.25.15. Available from:  
938 <http://doi.wiley.com/10.1002/0471142905.hg0725s87>
- 939 55. Gibbs RA, McGrath LM, Stevens C, Boerwinkle E, Rehnström K, Palotie A, et al. A  
940 framework for the interpretation of de novo mutation in human disease. *Nat Genet*  
941 [Internet]. 2014;46(9):944–50. Available from: <http://dx.doi.org/10.1038/ng.3050>  
942
